# Supplementary material
Source: HighWire-hosted journal article supplement (https://bmjopen.bmj.com/content/6/4/e010777)
Supplement: inline-supplementary-material-1 [file inline-supplementary-material-1.pdf]

## **Appendix A. Oncokompas<sup>2.0</sup>**

The eHealth application Oncokompas<sup>2.0</sup> is a personal and interactive application to support patients who have been treated for cancer. Oncokompas<sup>2.0</sup> consists of three steps; “Measure”, “Learn” and “Act”.

In the “Measure” component patients can monitor their quality of life (QOL) with patient reported outcomes (PROs). The QOL domains used in Oncokompas<sup>2.0</sup> include physical functioning in general but also specific physical symptoms and concerns after colon cancer, psychological functioning, social functioning, healthy lifestyle and existential issues. Patients decide which domain(s) they want to explore. A clickable demo and an animation video are available on the website [www.oncokompas.nl](http://www.oncokompas.nl). PROs on colon cancer were selected by a team of experts together with the project team of Oncokompas<sup>2.0</sup> and based on the national guideline of colorectal cancer and literature.<sup>1</sup>

Subsequently, patients receive automatically generated tailored feedback on data from their PROs in the “Learn” component, which are based on algorithms. These algorithms are based on existing Dutch guidelines and discussed by the expert team until consensus was reached. Feedback is shown using three colours, red (seriously elevated wellbeing risks), orange (elevated wellbeing risks) and green (no elevated wellbeing risks). Additional personalized information about the specific PROs will be provided. Furthermore self-support advice is shown in the “Learn” component, which is tailored to the individual outcomes of the patients.

Afterwards, personalized supportive care options (care professionals and self-management options) are provided in the “Act” component, which are based on individual PROs and patients’ preferences. When patients receive a red score (seriously elevated wellbeing risks) in the “Learn” component, the advice in the “Act” component includes to consult their GP or medical specialist.
